# Supplementary material for: Ancient phylogenetic divergence of the enigmatic African rodent Zenkerella and the origin of anomalurid gliding
Source: PeerJ. 2016 Aug 16;4:e2320. doi: 10.7717/peerj.2320 (PMC4991859; doi:10.7717/peerj.2320)
Supplement: Data S1 [file peerj-04-2320-s001.xlsx]

## Sheet: Data S1
	Ancient phylogenetic divergence of the enigmatic African rodent Zenkerella and the origin of anomalurid gliding
	Heritage S, Fernández D, Sallam HM, Cronin DT, Esara Echube JM, Seiffert ER (2016)
	Data S1. Primer sequences, annealing temperatures and extension times.
	Amplicon	Forward Primer (5' to 3')	Reverse Primer (5' to 3')	Annealing Temperature (C)	Extension Time (min:sec)
	12S	CrCTGAAAATGyyTAGAhG	CATTATGCrAAAGGTAmwAG	49.3	01:45:00
	COX1	GTnTTTAGATTTACAGTCTAATGC	GGnTynrAyTCCTyCCTTTCT	51.9	02:00:00
	CYTB	ACATGAAAAAyCATyGTTGT	dAGAAyDyyAGCTTTGGG	47.2	01:45:00
	IRBP	AThGArCArGCnATGAArAG	AGrTCyTCyTCnGAnACnAC	52	01:15:00
	VWF	CnGArCCnCCnCTnCAyGAyTT	CCrATyCTyTCvAGyTCyTG	50.7	01:30:00
