# Supplementary material for: Ancient phylogenetic divergence of the enigmatic African rodent Zenkerella and the origin of anomalurid gliding
Source: PeerJ. 2016 Aug 16;4:e2320. doi: 10.7717/peerj.2320 (PMC4991859; doi:10.7717/peerj.2320)
Supplement: Data S6 [file peerj-04-2320-s006.xlsx]

## Sheet: Data S6
	Ancient phylogenetic divergence of the enigmatic African rodent Zenkerella and the origin of anomalurid gliding
	Heritage S, Fernández D, Sallam HM, Cronin DT, Esara Echube JM, Seiffert ER (2016)
	Data S6. Chronology and provenance of fossils used in tip-dating analysis
	Species	Country	Locality	Upper and lower bounds on age prior	References
	Kabirmys qarunensis	Egypt	BQ-2	36.7-37.8 Ma	Sallam et al., 2010b
	Nementchamys lavocati	Algeria	Bir el-Ater (Nementcha)	33.9-41.2 Ma	Jaeger et al., 1985
	Nonanomalurus soniae	Kenya, Uganda	Napak, Rusinga	18-20 Ma	Lavocat, 1973; Pickford et al., 2008
	Paranomalurus bishopi	Kenya, Uganda	Koru, Napak, Songhor	19-21 Ma	Lavocat, 1973; Pickford et al., 2008
	Paranomalurus walkeri	Kenya, Uganda	Koru, Napak, Songhor	19-21 Ma	Lavocat, 1973; Pickford et al., 2008
	Pondaungimys anomaluropsis	Myanmar	Paukkaung PK2, Saba Pondaung PK4-Spg	36.7, 40.1 Ma	Marivaux et al., 2005
	Propedetes efeldensis	Namibia	Elisabethfeld, Lagental	19-21 Ma	Mein & Pickford, 2008
	Prozenkerella saharaensis	Libya	Zallah 7 Incision Locality	29.2-33.2 Ma	Coster et al., 2015
	Shazurus minutus	Egypt	BQ-2	36.7-37.8 Ma	Sallam et al., 2010a
	Zenkerella wintoni	Kenya	Songhor	19-21 Ma	Lavocat, 1973
